# Supplementary material for: One-step, kit-based radiopharmaceuticals for molecular SPECT imaging: a versatile diphosphine chelator for 99mTc radiolabelling of peptides
Source: Dalton Trans. 2021 Oct 15;50(44):16156–65. doi: 10.1039/d1dt03177e (PMC8594432; doi:10.1039/d1dt03177e)
Supplement: DT-050-D1DT03177E-s001 [file DT-050-D1DT03177E-s001.pdf]

# One-step, kit-based radiopharmaceuticals for molecular SPECT imaging: a versatile diphosphine chelator for $^{99m}\text{Tc}$ radiolabelling of peptides

## SUPPORTING INFORMATION

Ingebjørg N. Hungnes,<sup>a</sup> Fahad Al-Saleme, <sup>a</sup> Peter J. Gawne,<sup>a</sup> Thomas Eykyn,<sup>a</sup> R. Andrew Atkinson,<sup>b,c</sup> Samantha Y. A. Terry,<sup>a</sup> Fiona Clarke,<sup>d</sup> Philip J. Blower,<sup>a</sup> Paul G. Pringle<sup>e</sup> and Michelle T. Ma<sup>\*a</sup>

<sup>a</sup> King's College London, School of Biomedical Engineering and Imaging Sciences, 4<sup>th</sup> Floor Lambeth Wing, St Thomas' Hospital, London, UK.

<sup>b</sup> King's College London, Randall Centre for Cell and Molecular Biophysics and Centre for Biomolecular Spectroscopy, London, UK.

<sup>c</sup> Institut de Pharmacologie et de Biologie Structurale, IPBS, Université de Toulouse, CNRS, Université Paul Sabatier, 31077 Toulouse, France.

<sup>d</sup> King's College London, Academic Department of Rheumatology, Centre for Molecular and Cellular Biology of Inflammation, Faculty of Life Sciences and Medicine, London, UK.

<sup>e</sup> University of Bristol, School of Chemistry, Cantock's Close, Bristol, UK

email for correspondence: michelle.ma@kcl.ac.uk

|                                                                                                                                       |           |
|---------------------------------------------------------------------------------------------------------------------------------------|-----------|
| <b>Figure S1:</b> HR-ESI-MS                                                                                                           | Page 2    |
| <b>Figure S2:</b> Analytical reverse phase C18 HPLC trace of DP-RGD                                                                   | Page 3    |
| <b>Figure S3, S4:</b> $^1\text{H}$ TOCSY spectra                                                                                      | Pages 3-4 |
| <b>Figure S5:</b> $^1\text{H}$ - $^{13}\text{C}$ HSQC spectra                                                                         | Page 4    |
| <b>Figure S6:</b> Full $^{31}\text{P}\{\text{H}\}$ NMR of DP-RGD and <i>trans</i> -/ <i>cis</i> - $[\text{ReO}_2(\text{DP-RGD})_2]^+$ | Page 5    |
| <b>Figure S7:</b> Full radio-HPLC trace of <i>trans</i> -/ <i>cis</i> - $[\text{MO}_2(\text{DP-RGD})_2]^+$ (M = Tc, Re)               | Page 5    |
| <b>Figure S8:</b> Full radio-HPLC trace of <i>trans</i> -/ <i>cis</i> - $^{99m/99g}\text{TcO}_2(\text{DP-RGD})_2]^+$                  | Page 6    |
| <b>Figure S9:</b> SPECT/CT imaging data of $^{99m}\text{TcO}_2(\text{DP-RGD})_2]^+$ in a healthy mouse                                | Page 6    |
| <b>Figure S10:</b> Radioactivity concentration in ankles and wrists of rheumatoid arthritic mice                                      | Page 7    |
| <b>Figure S11:</b> Biodistribution of $^{99m}\text{TcO}_2(\text{DP-RGD})_2]^+$ in rheumatoid arthritis mice                           | Page 7    |
| <b>Table S1:</b> Summary of $^1\text{H}$ chemical shifts                                                                              | Page 8    |
| <b>Table S2:</b> Summary of $^{13}\text{C}$ chemical shifts                                                                           | Page 9    |
| <b>Table S3:</b> Biodistribution of $^{99m}\text{Tc}$ in healthy balb/c mice                                                          | Page 10   |

### A DP-RGD

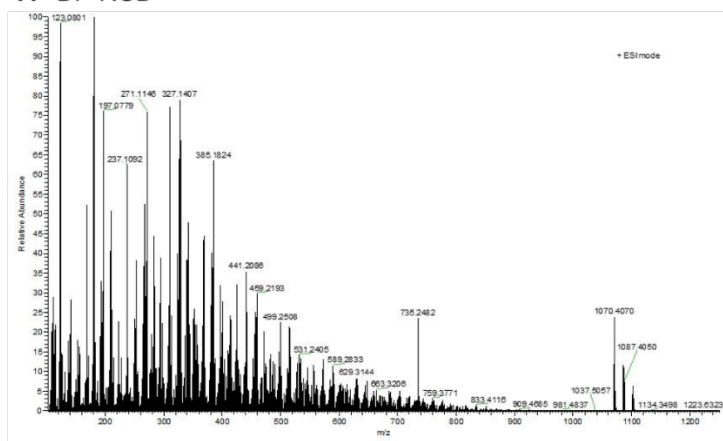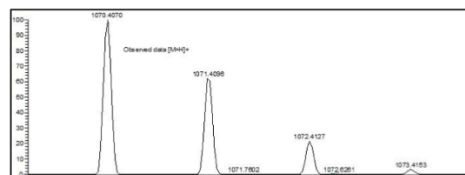

### B *trans*-[ReO<sub>2</sub>(DP-RGD)<sub>2</sub>]<sup>+</sup>

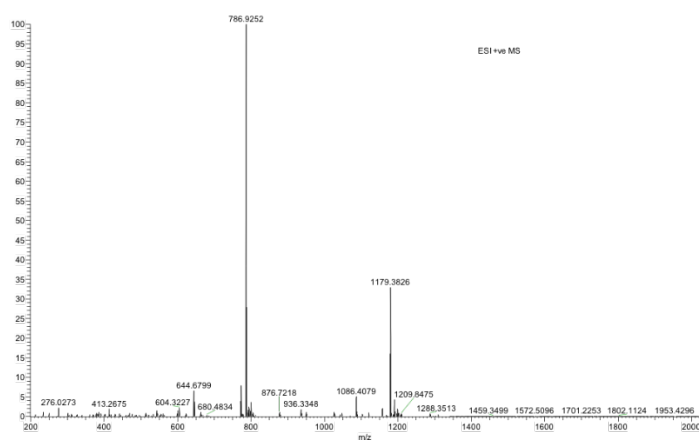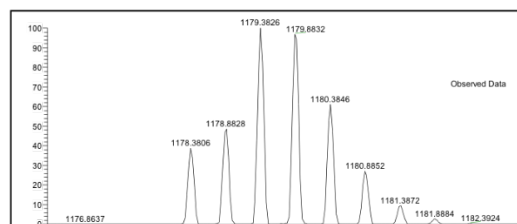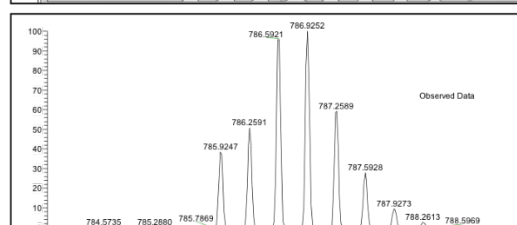

### C *cis*-[ReO<sub>2</sub>(DP-RGD)<sub>2</sub>]<sup>+</sup>

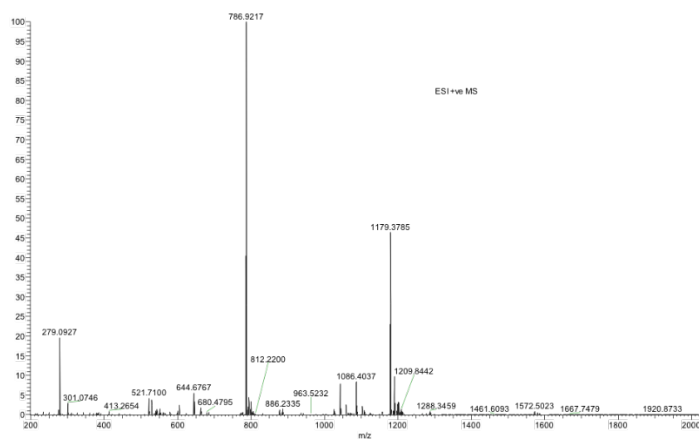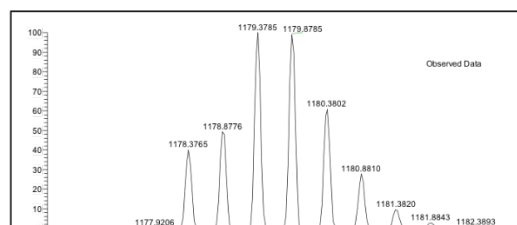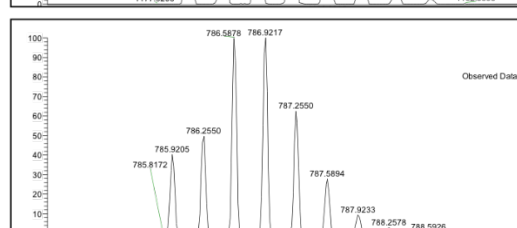

**Figure S1** HR-ESI-MS of **(A)** DP-RGD, **(B)** *trans*-[ReO<sub>2</sub>(DP-RGD)<sub>2</sub>]<sup>+</sup> and **(C)** *cis*-[ReO<sub>2</sub>(DP-RGD)<sub>2</sub>]<sup>+</sup>. For DP-RGD, calculated monoisotopic peak for [M + H]<sup>+</sup>: [C<sub>55</sub>H<sub>61</sub>O<sub>10</sub>N<sub>9</sub>P<sub>2</sub> + H]<sup>+</sup>, 1070.4089. For both [ReO<sub>2</sub>(DP-RGD)<sub>2</sub>]<sup>+</sup> species, the major signals in the ESI-MS correspond to the tripositive and dipositive cations of the [ReO<sub>2</sub>(DP-RGD)<sub>2</sub>]<sup>+</sup> complex. Calculated monoisotopic peak for [M + 2H]<sup>3+</sup>: [ReC<sub>110</sub>H<sub>124</sub>N<sub>18</sub>O<sub>22</sub>P<sub>4</sub>]<sup>3+</sup>, 785.92. Calculated monoisotopic peak for [M + H]<sup>2+</sup>: [ReC<sub>110</sub>H<sub>123</sub>N<sub>18</sub>O<sub>22</sub>P<sub>4</sub>]<sup>2+</sup>, 1178.38.

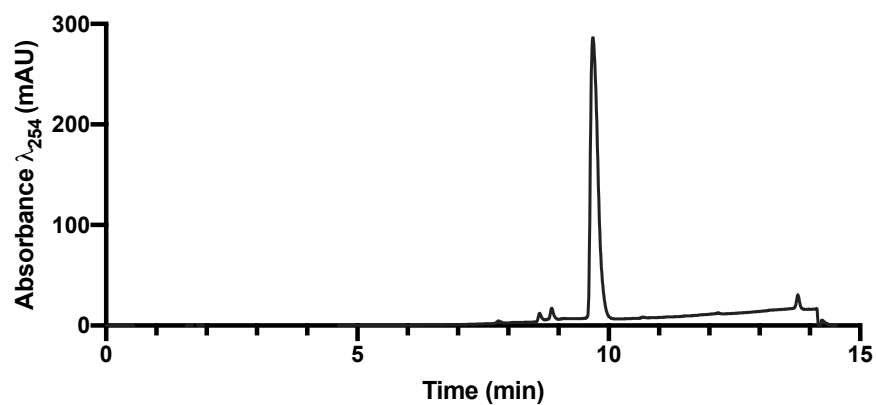

**Figure S2** Analytical reverse phase C18 UV (254 nm) HPLC trace of DP-RGD.

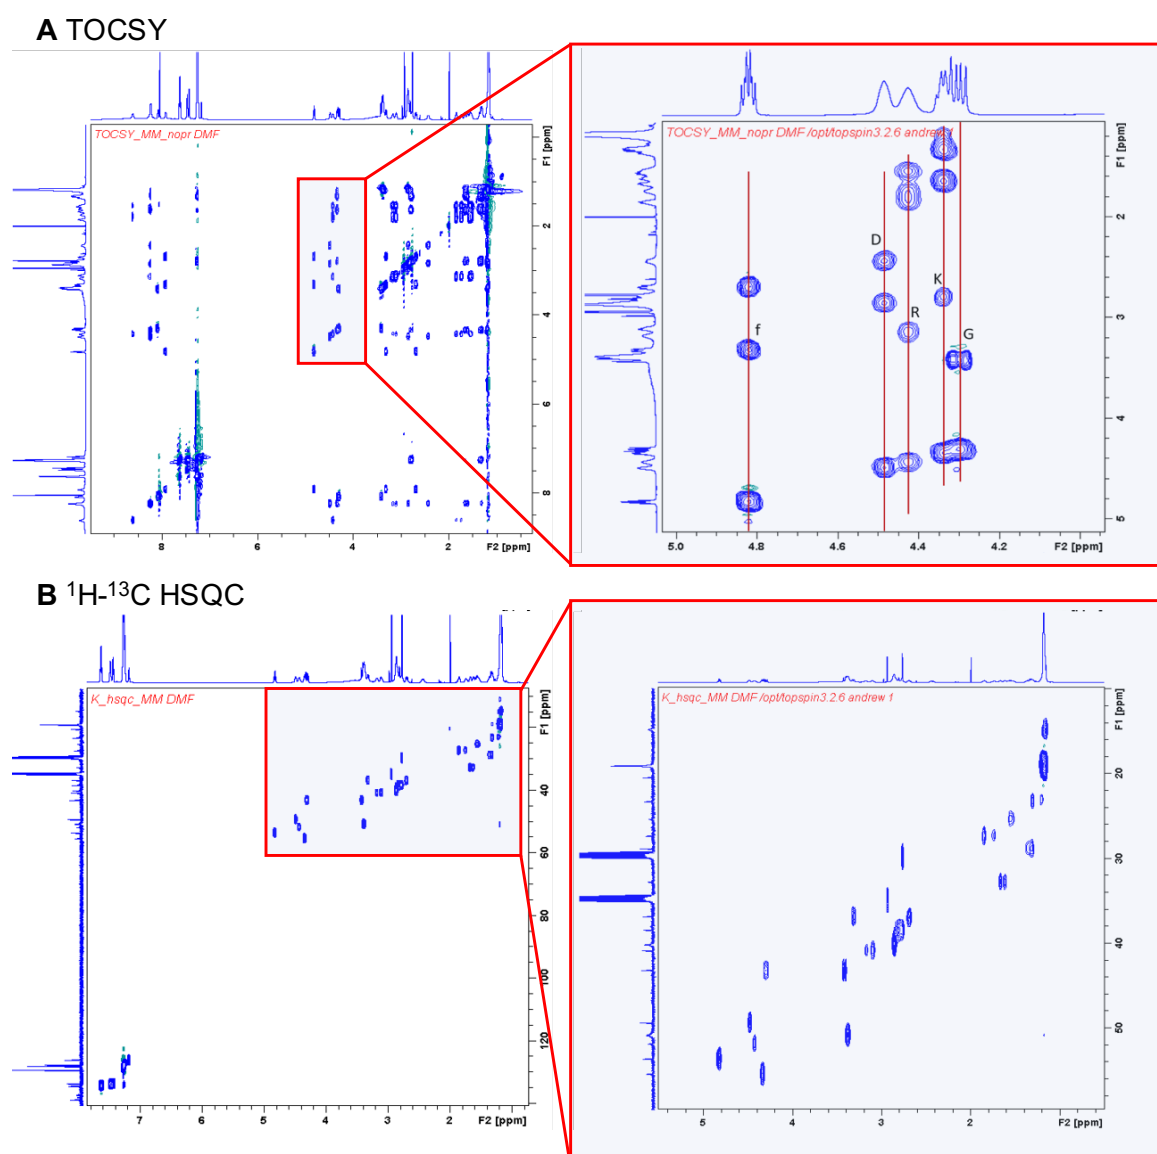

**Figure S3 (A)**  $^1\text{H}$  TOCSY spectrum of DP-RGD (left) with expansion (right) showing crosspeak signals from peptide  $\alpha\text{CH}$  protons and aliphatic protons from their respective amino acid sidechains; **(B)**  $^1\text{H}$ - $^{13}\text{C}$  HSQC spectrum of DP-RGD (left) with expansion (right) of aliphatic region, showing signals from amino acid sidechains.

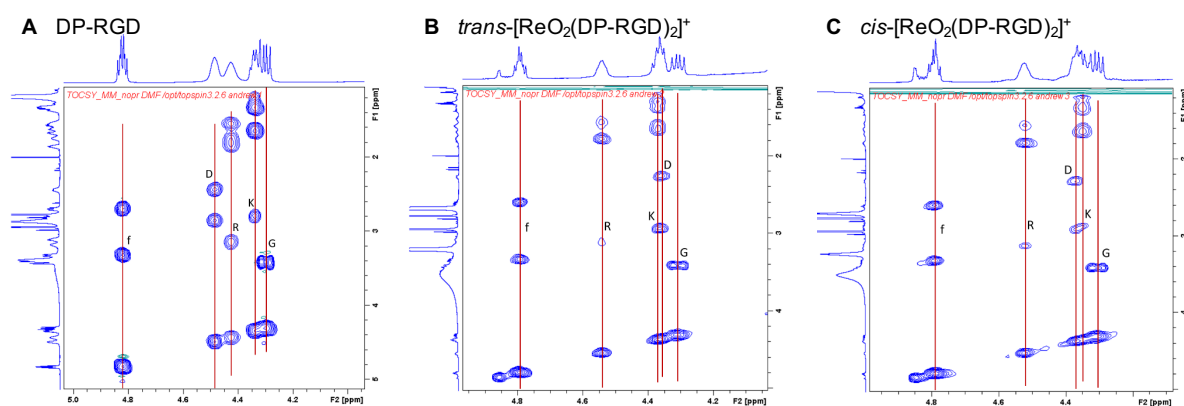

**Figure S4**  $^1\text{H}$  TOCSY spectral regions depicting signals from peptide  $\alpha\text{CH}$  protons and aliphatic protons from their respective amino acid sidechains, for **(A)** DP-RGD, **(B)**  $\text{trans-}[\text{ReO}_2(\text{DP-RGD})_2]^+$ , and **(C)**  $\text{cis-}[\text{ReO}_2(\text{DP-RGD})_2]^+$ . With the exception of aspartic acid (D) chemical shifts, which are sensitive to changes in solvent pH,  $^1\text{H}$  chemical shifts for the RGD peptide motif are minimally affected by  $\text{Re}^{\text{V}}$  binding.

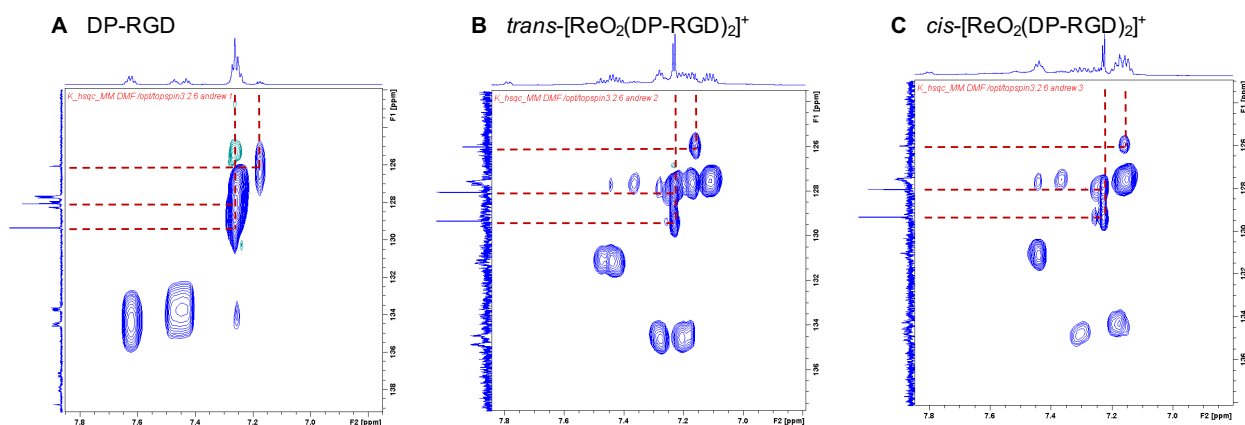

**Figure S5**  $^1\text{H}$ - $^{13}\text{C}$  HSQC spectra of aromatic regions, for **(A)** DP-RGD, **(B)**  $\text{trans-}[\text{ReO}_2(\text{DP-RGD})_2]^+$ , and **(C)**  $\text{cis-}[\text{ReO}_2(\text{DP-RGD})_2]^+$ . The dotted red lines denote signals arising from the D-phenylalanine sidechain, whilst other crosspeak signals arise from the P- $\text{C}_6\text{H}_5$  groups. The  $^1\text{H}$  and  $^{13}\text{C}$  chemical shifts arising from the D-phenylalanine residue are minimally affected by  $\text{Re}^{\text{V}}$  binding. However, HSQC spectra indicated subtle changes in both the  $^1\text{H}$  and  $^{13}\text{C}$  chemical shifts of P- $\text{C}_6\text{H}_5$  groups upon  $\text{Re}^{\text{V}}$  binding. This includes an increase in the complexity of the  $^1\text{H}$  spectral region.

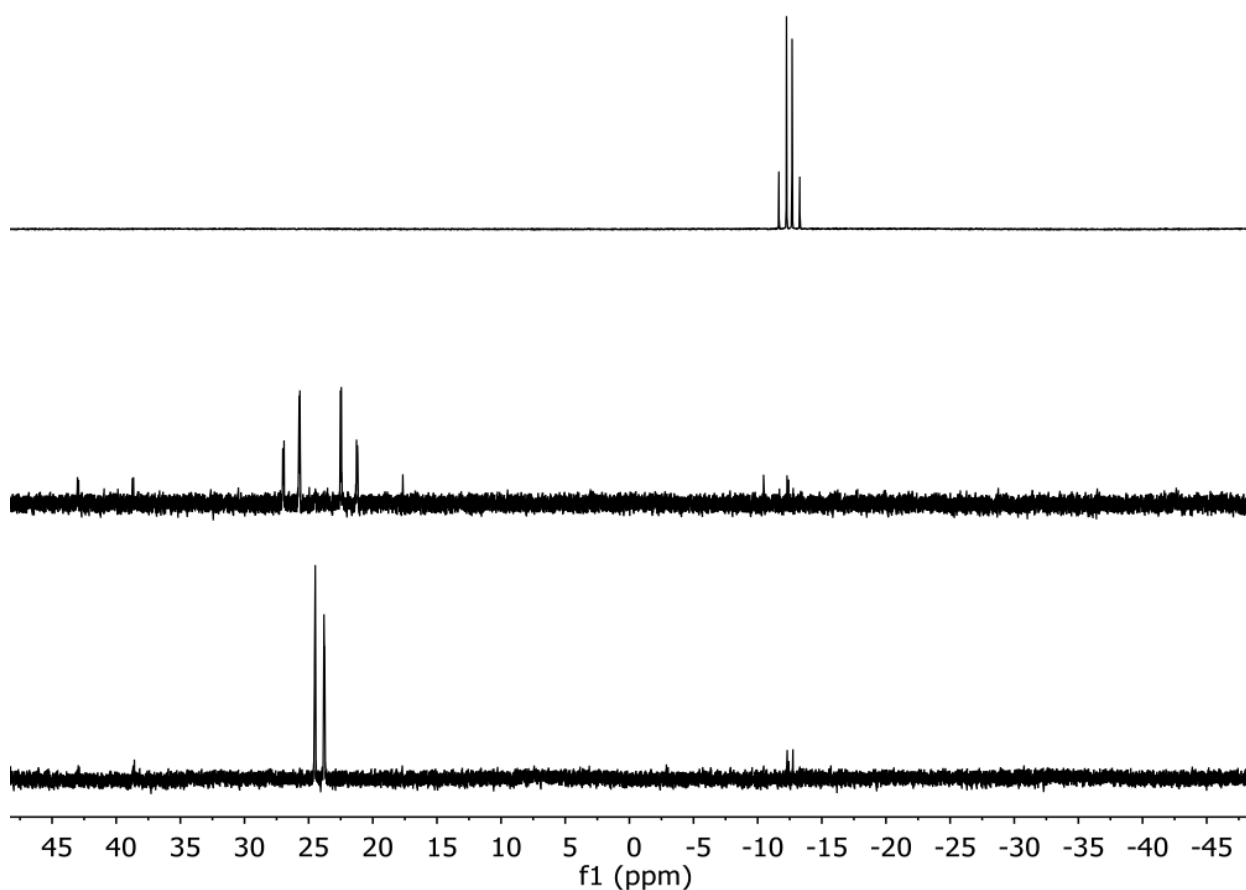

**Figure S6** Full  $^{31}\text{P}\{\text{H}\}$  NMR of DP-RGD (top),  $\text{cis-}[\text{Re}(\text{O})_2(\text{DP-RGD})_2]^+$  (middle) and  $\text{trans-}[\text{Re}(\text{O})_2(\text{DP-RGD})_2]^+$  (bottom).

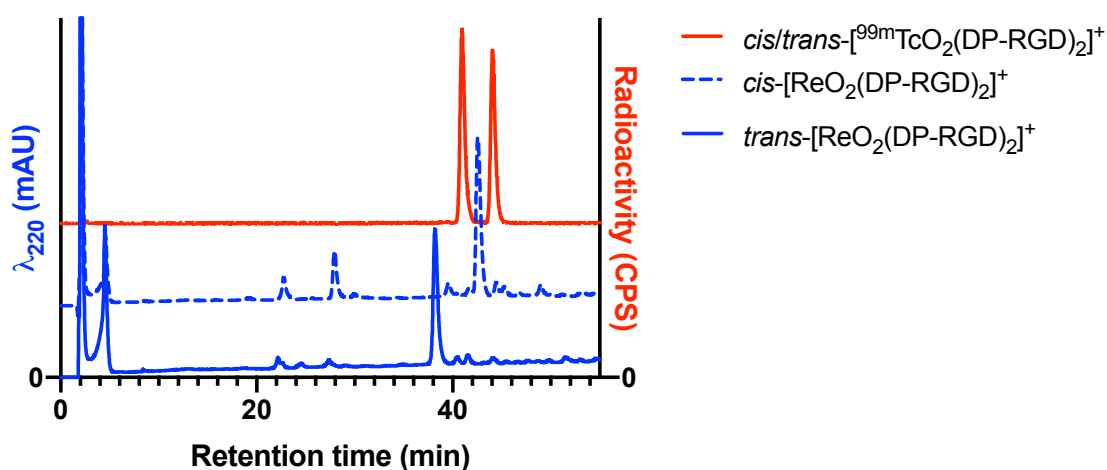

**Figure S7** Radio-HPLC trace of  $\text{trans-}/\text{cis-}[^{99\text{m}}\text{TcO}_2(\text{DP-RGD})_2]^+$  (red) prepared from an aqueous solution of  $^{99\text{m}}\text{TcO}_4^-$  and Kit 3, and HPLC traces ( $\lambda_{220}$ ) of  $\text{trans-}$  and  $\text{cis-}[\text{ReO}_2(\text{DP-RGD})_2]^+$  (blue). The difference in retention times between analogous  $^{99\text{m}}\text{Tc}$  and  $\text{Re}$  complexes is at least in part due to the configuration of the UV and scintillation detectors in series.

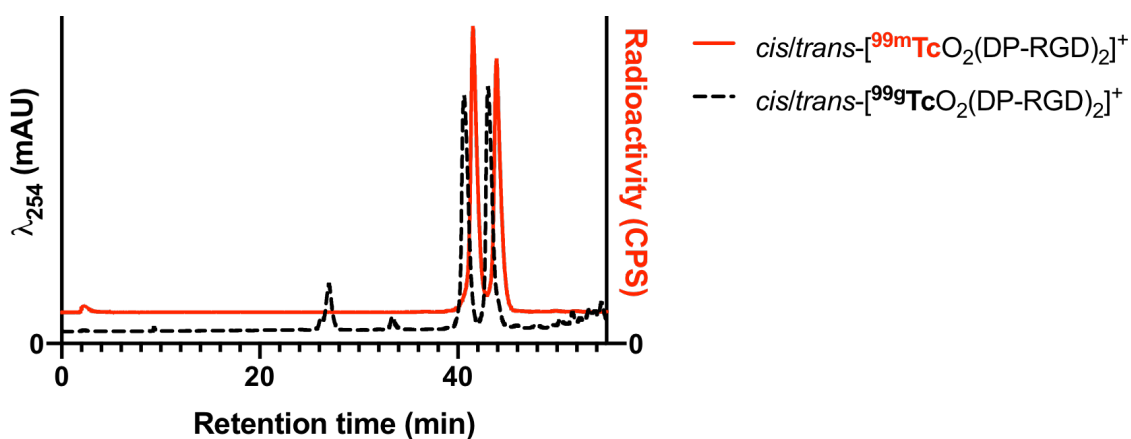

**Figure S8** Radio-HPLC trace of *trans*-/*cis*- $^{99m}\text{TcO}_2(\text{DP-RGD})_2^+$  (red) and UV-HPLC trace of *trans*-/*cis*- $^{99g}\text{TcO}_2(\text{DP-RGD})_2^+$  (black). The difference in retention times between  $^{99m}\text{Tc}$  and  $^{99g}\text{Tc}$  isotopologues is due to the configuration of the UV and scintillation detectors in series.

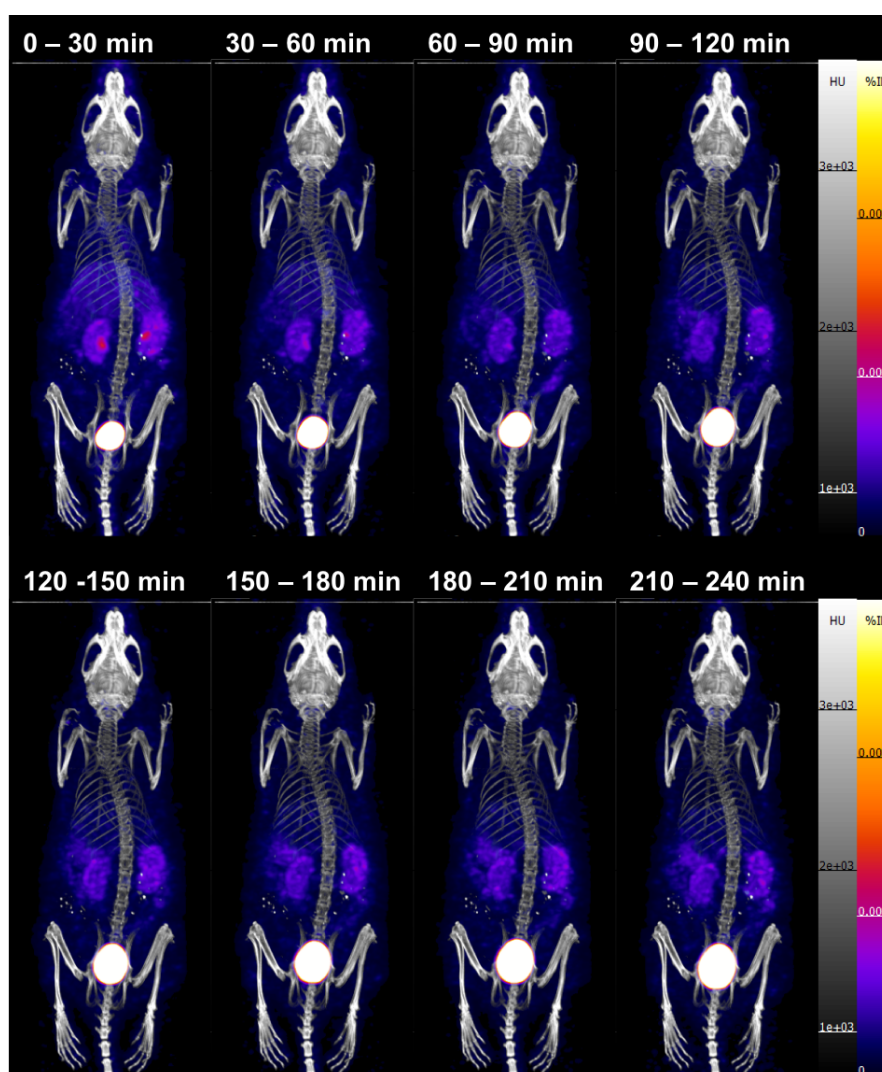

**Figure S9** SPECT/CT maximum intensity projection images of a balb/c mouse administered  $^{99m}\text{TcO}_2(\text{DP-RGD})_2^+$  intravenously. SPECT images were acquired over 4 hours in 30 min segments. Imaging analysis indicated that the majority of  $^{99m}\text{TcO}_2(\text{DP-RGD})_2^+$  cleared rapidly via a renal pathway: at 30 min PI (post-injection), 35% of the injected dose of radioactivity was in the bladder; at 2 h PI, 56% was in the bladder.

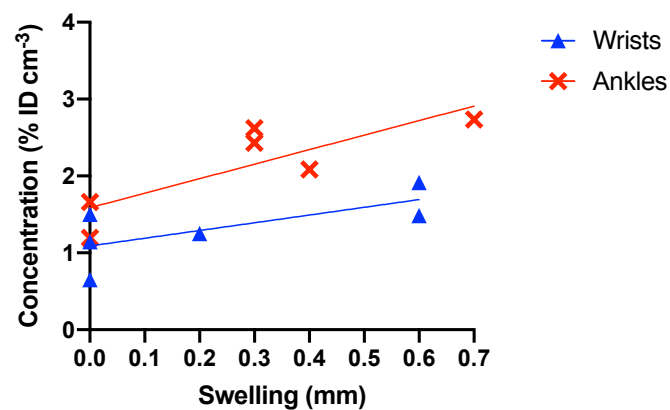

**Figure S10** In mice with induced rheumatoid arthritis, radioactivity concentration in ankles and wrists (measured using SPECT/CT image quantification) correlates with degree of joint swelling (measured using calipers). For ankles,  $y = 1.89x + 1.587$ ,  $R^2 = 0.69$ , and  $p = 0.04$  (significance of slope from non-zero). For wrists,  $y = 1.01x + 1.09$ ,  $R^2 = 0.49$ , and  $p = 0.12$ .

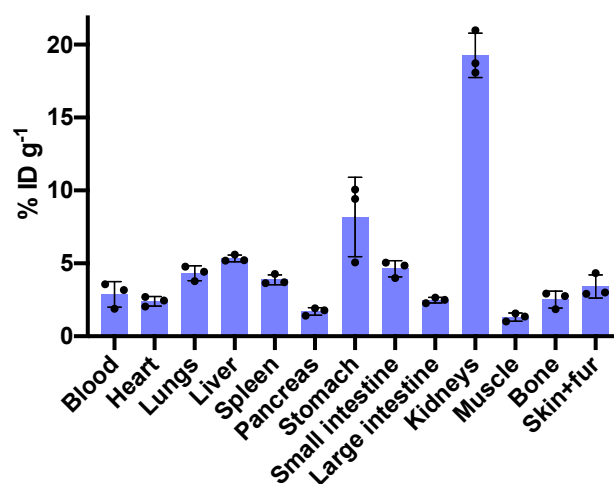

**Figure S11** Biodistribution of  $[^{99m}\text{TcO}_2(\text{DP-RGD})_2]^+$  in rheumatoid arthritis mice 1 h post-injection ( $n = 3$ ). Error bars correspond to standard deviation.

**Table S1:** Summary of  $^1\text{H}$  chemical shifts

| $^1\text{H}$ NMR | DP-RGD                         |       |              | <i>trans</i> -[ReO <sub>2</sub> (DP-RGD) <sub>2</sub> ] <sup>+</sup> |       |              | <i>cis</i> -[ReO <sub>2</sub> (DP-RGD) <sub>2</sub> ] <sup>+</sup> |       |              |
|------------------|--------------------------------|-------|--------------|----------------------------------------------------------------------|-------|--------------|--------------------------------------------------------------------|-------|--------------|
|                  | $\delta$ /ppm                  |       | <i>J</i> /Hz | $\delta$ /ppm                                                        |       | <i>J</i> /Hz | $\delta$ /ppm                                                      |       | <i>J</i> /Hz |
| DP               | CH(d/d')                       | 7.652 | q            | 7.17                                                                 | 7.281 | m            | 7.305                                                              | m     |              |
|                  |                                | 7.452 | dt           | 29.19, 6.76                                                          | 7.204 | m            | 7.175                                                              | m     |              |
|                  | CH(e/e')                       | 7.269 | m            | 7.170                                                                | 7.111 | m            | 7.151                                                              | m     |              |
|                  | CH(f/f')                       | 7.269 | m            | 7.477                                                                | 7.436 | m            | 7.439                                                              | m     |              |
| Lys              | NH                             | 8.237 | m            | 8.196                                                                | m     |              | 8.253                                                              | d     | 7.46         |
|                  | CH( $\alpha$ )                 | 4.337 | m            | 4.365                                                                | m     |              | 4.367                                                              | m     |              |
|                  | CH <sub>2</sub> ( $\beta$ )    | 1.664 | m            | 1.681                                                                | m     |              | 1.664                                                              | m     |              |
|                  |                                | 1.616 | m            |                                                                      |       |              | 1.599                                                              | m     |              |
|                  | CH <sub>2</sub> ( $\gamma$ )   | 1.153 | m            | 1.184                                                                | m     |              | 1.188                                                              | m     |              |
|                  | CH <sub>2</sub> ( $\delta$ )   | 1.334 | m            | 1.300                                                                | m     |              | 1.300                                                              | m     |              |
|                  | CH <sub>2</sub> ( $\epsilon$ ) | 2.807 | m            | 2.943                                                                | -     |              | 2.876                                                              | m     |              |
|                  |                                | 2.771 | m            |                                                                      |       |              |                                                                    |       |              |
| Arg              | NH( $\zeta$ )                  | 7.257 | -            | 8.294                                                                | -     |              | 8.088                                                              | m     |              |
|                  | NH                             | 8.610 | s            | 8.629                                                                | d     | 8.98         | 8.621                                                              | d     | 8.85         |
|                  | CH( $\alpha$ )                 | 4.425 | s            | 4.543                                                                | m     |              | 4.525                                                              | m     |              |
|                  | CH <sub>2</sub> ( $\beta$ )    | 1.847 | m            | 1.612                                                                | m     |              | 1.608                                                              | m     |              |
|                  |                                | 1.737 | s br         | 1.511                                                                | m     |              | 1.528                                                              | m     |              |
|                  |                                | 1.546 | m            | 1.769                                                                | m     |              | 1.785                                                              | m     |              |
|                  | CH <sub>2</sub> ( $\delta$ )   | 3.170 | s br         | 3.144                                                                | m     |              | 3.148                                                              | m     |              |
|                  |                                | 3.104 | m            | 3.067                                                                | m     |              | 3.109                                                              | m     |              |
| Gly              | NH                             | 8.082 | d            | 7.06                                                                 | 8.089 | m            | 8.087                                                              | m     |              |
|                  | CH( $\alpha$ )                 | 4.301 | dd           | 16.29, 9.01                                                          | 4.307 | dd           | 16.24, 2.67                                                        | 4.308 | dd           |
|                  |                                | 3.413 | dd           | 16.45, 2.98                                                          | 3.416 | dd           | 16.45, 9.05                                                        | 3.415 | -            |
| Asp              | NH                             | 8.237 | m            | 8.358                                                                | d     | 9.32         | 8.335                                                              | d     | 8.85         |
|                  | CH( $\alpha$ )                 | 4.484 | s            | 4.358                                                                | m     |              | 4.379                                                              | m     |              |
|                  | CH <sub>2</sub> ( $\beta$ )    | 2.428 | m            | 2.940                                                                | m     |              | 2.924                                                              | -     |              |
|                  |                                | 2.840 | m            | 2.261                                                                | m     |              | 2.283                                                              | m     |              |
| Phe              | NH                             | 7.792 | d            | 7.68                                                                 | 7.787 | d            | 8.98                                                               | 7.798 | d            |
|                  | CH( $\alpha$ )                 | 4.821 | td           | 8.74, 5.84                                                           | 4.796 | m            |                                                                    | 4.789 | m            |
|                  | CH <sub>2</sub> ( $\beta$ )    | 3.314 | dd           | 14.22, 5.44                                                          | 3.330 | dd           | 9.26, 5.00                                                         | 3.319 | dd           |
|                  |                                | 2.688 | dd           | 13.80, 8.92                                                          | 2.601 | dd           | 14.51, 9.26                                                        | 2.606 | m            |
|                  | CH(o)                          | 7.269 | m            | 7.232                                                                | m     |              | 7.220                                                              | m     |              |
|                  | CH(m)                          | 7.269 | m            | 7.232                                                                | m     |              | 7.220                                                              | m     |              |
|                  | CH(p)                          | 7.258 | m            | 7.161                                                                | m     |              | 7.158                                                              | m     |              |

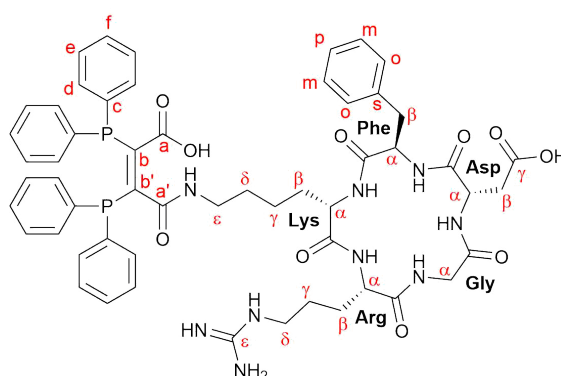

**Table S2:** Summary of  $^{13}\text{C}$  chemical shifts

| <sup>13</sup> C NMR |                     | DP-RGD |       | <i>trans</i> -[ReO <sub>2</sub> (DP-RGD) <sub>2</sub> ] <sup>+</sup> |       | <i>cis</i> -[ReO <sub>2</sub> (DP-RGD) <sub>2</sub> ] <sup>+</sup> |       |
|---------------------|---------------------|--------|-------|----------------------------------------------------------------------|-------|--------------------------------------------------------------------|-------|
|                     |                     | δ/ ppm | mult. | δ/ ppm                                                               | mult. | δ/ ppm                                                             | mult. |
| DP                  | C <sub>a/a'</sub>   | *      |       | **                                                                   |       | ***                                                                |       |
|                     | C <sub>b/b'</sub>   | *      |       | **                                                                   |       | ***                                                                |       |
|                     | C <sub>c/c'</sub>   | 137.52 | m     | 118.09                                                               | m     | 118.05                                                             | m     |
|                     | C <sub>d/d'</sub>   | 134.09 | m     | 134.63                                                               | m     | 143.80                                                             | m     |
|                     |                     |        |       |                                                                      |       | 134.27                                                             | m     |
|                     | C <sub>e/e'</sub>   | 127.68 | m     | 127.55                                                               | m     | 127.55                                                             | m     |
|                     | C <sub>f/f'</sub>   | 128.13 | m     | 131.13                                                               | m     | 131.04                                                             | m     |
| Lys                 | CH(α)               | 55.39  | s     | 55.59                                                                | s     | 55.52                                                              | s     |
|                     | CH <sub>2</sub> (β) | 32.74  | s     | 32.87                                                                | s     | 32.84                                                              | s     |
|                     | CH <sub>2</sub> (γ) | 14.77  | s     | 15.56                                                                | s     | 15.56                                                              | s     |
|                     | CH <sub>2</sub> (δ) | 28.76  | s     | 29.47                                                                | s     | 29.54                                                              | -     |
|                     | CH <sub>2</sub> (ε) | 38.46  | s     | 38.98                                                                | s     | 38.91                                                              | s     |
| Arg                 | CH(α)               | 51.87  | s     | 51.32                                                                | s     | 51.37                                                              | s     |
|                     | CH <sub>2</sub> (β) | 27.29  | s     | 24.66                                                                | s     | 24.32                                                              | s     |
|                     | CH <sub>2</sub> (γ) | 25.35  | s     | 27.14                                                                | s     | 27.09                                                              | s     |
|                     | CH <sub>2</sub> (δ) | 40.86  | s     | 41.04                                                                | s     | 41.04                                                              | s     |
|                     | CN(ε)               | *      |       | **                                                                   |       | ***                                                                |       |
| Gly                 | CH(α)               | 43.11  | s     | 43.11                                                                | s     | 43.09                                                              | s     |
| Asp                 | CH(α)               | 49.39  | s     | 49.12                                                                | s     | 49.21                                                              | s     |
|                     | CH <sub>2</sub> (β) | 38.38  | s     | 38.77                                                                | s     | 38.63                                                              | s     |
|                     | CO(γ)               | *      |       | **                                                                   |       | ***                                                                |       |
| Phe                 | CH(α)               | 53.65  | s     | 53.36                                                                | s     | 53.37                                                              | s     |
|                     | CH <sub>2</sub> (β) | 36.91  | s     | 36.86                                                                | s     | 36.81                                                              | s     |
|                     | C(s)                | 138.77 | s     | not found                                                            |       | not found                                                          |       |
|                     | CH(o/m)             | 128.06 | s     | 129.31                                                               | s     | 129.31                                                             | s     |
|                     |                     | 129.34 | s     | 128.02                                                               | s     | 128.02                                                             | s     |
|                     | CH(p)               | 126.05 | s     | 125.99                                                               | s     | 125.99                                                             | s     |

\*For DP-RGD, 11 signals are observed in the 158.3-172.9 region, accounting for the eight carbonyl groups (C<sub>a/a'</sub>, C<sub>b/b'</sub>, 5 peptide bond carbonyls), two alkene carbons (C<sub>b/b'</sub>) and Arg C<sub>ε</sub>.

\*\*For *trans*-[ReO<sub>2</sub>(DP-RGD)<sub>2</sub>]<sup>+</sup>, signals for C=X, where X = O, N or C are weak, although >9 signals are observed in the 158.21-172.63 ppm region.

\*\*\*For *cis*-[ReO<sub>2</sub>(DP-RGD)<sub>2</sub>]<sup>+</sup>, signals for C=X, where X = O, N or C are weak, although multiple signals are observed in the 158.03-185.17 ppm region.

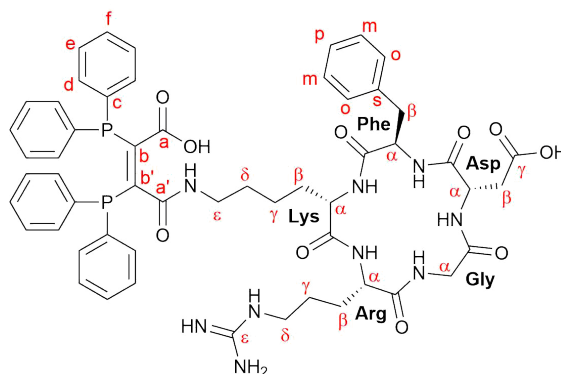

**Table S3:** Biodistribution of  $^{99m}\text{Tc}$  in healthy balb/c mice (n = 4) administered either  $[^{99m}\text{TcO}_2(\text{DP-RGD})_2]^+$  or  $[^{99m}\text{TcO}_2(\text{DP-RGD})_2]^+ + \text{RGD peptide}$  (to inhibit  $\alpha_v\beta_3$  integrin uptake of radiotracer)

| Organ/tissue    | 1 h PI, %ID g <sup>-1</sup> (± SD) | With block, 1 h PI,<br>%ID g <sup>-1</sup> (± SD) | Mean difference, %ID g <sup>-1</sup> | p value              |
|-----------------|------------------------------------|---------------------------------------------------|--------------------------------------|----------------------|
| Blood           | 1.57±0.21                          | 1.61±0.42                                         | 0.04                                 | $8.8 \times 10^{-1}$ |
| Heart           | 1.92±0.10                          | 0.90±0.17                                         | 1.02                                 | $2.5 \times 10^{-4}$ |
| Lungs           | 7.55±1.44                          | 5.50±0.86                                         | 2.05                                 | $5.1 \times 10^{-2}$ |
| Liver           | 7.42±0.91                          | 4.07±0.36                                         | 3.35                                 | $4.8 \times 10^{-4}$ |
| Spleen          | 3.64±0.45                          | 1.31±0.12                                         | 2.33                                 | $5.9 \times 10^{-5}$ |
| Pancreas        | 1.02±0.11                          | 0.40±0.05                                         | 0.62                                 | $4.1 \times 10^{-5}$ |
| Stomach         | 4.77±0.58                          | 1.20±0.24                                         | 3.57                                 | $2.8 \times 10^{-5}$ |
| Small intestine | 4.41±0.45                          | 0.99±0.04                                         | 3.57                                 | $5.0 \times 10^{-6}$ |
| Large intestine | 2.24±0.20                          | 0.53±0.11                                         | 3.42                                 | $6.0 \times 10^{-6}$ |
| Kidneys         | 17.11±2.07                         | 15.25±1.43                                        | 1.71                                 | $1.9 \times 10^{-1}$ |
| Muscle          | 0.93±0.15                          | 0.41±0.10                                         | 1.86                                 | $1.1 \times 10^{-3}$ |
| Bone            | 1.73±0.55                          | 0.89±0.17                                         | 0.52                                 | $2.7 \times 10^{-2}$ |
| Skin+fur        | 2.48±0.88                          | 2.02±0.30                                         | 0.46                                 | $3.5 \times 10^{-1}$ |
